# Supplementary material for: Metabolomic Profiling of Pompe Disease‐Induced Pluripotent Stem Cell‐Derived Cardiomyocytes Reveals That Oxidative Stress Is Associated with Cardiac and Skeletal Muscle Pathology
Source: PubMed Central journal article supplement (PMC5442755; doi:10.5966/sctm.2015-0409), 2016-08-18
Supplement: SCT3-6-031-s001.pdf [file SCT3-6-031-s001.pdf]

1 Supplemental Figure—Ohashi et al.

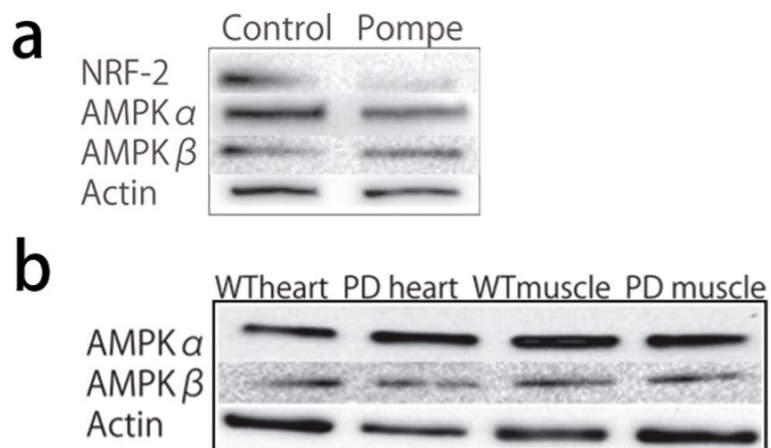

2

3 Figure S1. Western blot analysis. (a) PD iPSC-derived cardiomyocytes. (b) Cardiomyocytes and

4 skeletal muscle cells from PD mice.

5
